# Supplementary material for: Formation of nanoscale networks: selectively swelling amphiphilic block copolymers with CO2-expanded liquids
Source: Royal Society of Chemistry journal article supplement (doi:10.1039/c2nr33188h), 2012-12-14
Supplement: c2nr33188h.pdf [file c2nr33188h.pdf]

## Supporting Information

### Vapor-liquid equilibrium phase diagrams of the CO<sub>2</sub>/methanol, CO<sub>2</sub>/ethanol and CO<sub>2</sub>/water systems at 45 °C

#### 1. Equations of State

In this work, the Stryjek and Vera modification of the Peng-Robinson equation of state (PRSV-EoS) [1] are applied to represent the VLE of the binary systems involving carbon dioxide, methanol, ethanol and water at 45 °C and different pressures.

PR-EoS is of the form

$$P = \frac{RT}{v-b} - \frac{a(T)}{v^2 + 2bv - b^2} \quad (1)$$

where  $T$ ,  $P$  and  $v$  are the temperature, pressure and molar volume. Parameters  $a$  and  $b$  are given by

$$a_i = 0.457235 \frac{(RT_{ci})^2}{P_{ci}} \left[ 1 + \kappa_i \left( 1 - \sqrt{\frac{T}{T_{ci}}} \right) \right]^2 \quad (2)$$

$$b_i = 0.077796 \frac{RT_{ci}}{P_{ci}} \quad (3)$$

For the PR-EoS, the  $\kappa_i$  term has the form

$$\kappa_i = 0.37464 + 1.54226\omega_i - 0.26992\omega_i^2 \quad (4)$$

where  $\omega$  is Pitzer's acentric factor. For the PRSV-EoS,  $\kappa_i$  is given by

$$\kappa_i = \kappa_{0i} + \kappa_{1i} \left( 1 + \sqrt{\frac{T}{T_{ci}}} \right) \left( 0.7 - \frac{T}{T_{ci}} \right) \quad (5)$$

with

$$\kappa_{0i} = 0.378893 + 1.4897153\omega_i - 0.17131848\omega_i^2 + 0.0196554\omega_i^3 \quad (6)$$

For mixtures, the Panagiotopoulos-Reid mixing rules are used,

$$a = \sum_i \sum_j x_i x_j (a_i a_j)^{1/2} [1 - k_{ij} + (k_{ij} - k_{ji}) x_i] \quad (7)$$

$$b = \sum_i \sum_j x_i x_j \left( \frac{b_i + b_j}{2} \right) \quad (8)$$

Table 1 gives the pure component parameters,  $T_{ci}$ ,  $P_{ci}$ ,  $\omega_i$ , and  $k_{1i}$ .

**Table 1. Pure component parameters**

| Compound       | $T_c$ (K) | $P_c$ (MPa) | $\omega$ | $k_1$    |
|----------------|-----------|-------------|----------|----------|
| Carbon dioxide | 304.21    | 7.382       | 0.225    | 0.04285  |
| Methanol       | 512.64    | 8.097       | 0.565    | -0.16816 |
| Ethanol        | 513.92    | 6.148       | 0.644    | -0.03374 |
| Water          | 647.29    | 22.09       | 0.344    | -0.06635 |

## 2. Calculation method

For a multicomponent system, the VLE is obtained equating the fugacities of each component in the vapor phase and in the liquid phases:

$$f_i^V(P, T) = f_i^L(P, T) \quad (9)$$

$$\varphi_i^V y_i P = \varphi_i^L x_i P$$

where  $\varphi_i$  is the fugacity coefficient of component  $i$  ( $i=1=CO_2$ ), that is easily obtained from the equation of state. For each phase,

$$\sum_{i=1}^N y_i = 1; \sum_{i=1}^N x_i = 1 \quad (10)$$

where  $N$  is the number of components. For the binary systems VLE data were used to correlate the cross interaction parameters  $k_{ij}$  and  $k_{ji}$ . The Simplex optimization method was used for the parameter regression using the objective function

$$F = \sum_{j=1}^n [0.6 \times (x_{1,j}^{\text{exp}} - x_{1,j}^{\text{cal}})^2 + 0.4 \times (y_{1,j}^{\text{exp}} - y_{1,j}^{\text{cal}})^2] \quad (11)$$

where  $n$  is the number of the experimental data points. The temperature dependence of the interaction parameters was required because different experimental data were used under various temperatures; typically, they are expressed by linear relationships,

$$k_{ij} = c_{ij} + d_{ij} T \quad k_{ji} = c_{ji} + d_{ji} T \quad (12)$$

### 3. Results of the three binaries

Figure 1 compares the calculated VLE data at 45 °C with the parameters listed in Table 2. Figure 1a shows a critical pressure of 10.8 MPa with the CO<sub>2</sub> molar fraction of 0.882 for the CO<sub>2</sub>(1)/methanol (2) mixture at 45 °C, therefore, the system is supercritical fluid when the pressure is larger than 10.8 MPa and CO<sub>2</sub> molar fraction larger than 0.882. Figure 1b also indicates a critical pressure of 10.5 MPa with the CO<sub>2</sub> molar fraction of 0.903 for the CO<sub>2</sub>/ethanol system at 45 °C, suggesting the system is supercritical fluid when the pressure is larger than 10.5 MPa and CO<sub>2</sub> molar fraction larger than 0.903. Yet Figure 1c reveals that the CO<sub>2</sub>/water system does not appear supercritical fluid with vapor-liquid two phases at 45 °C and pressures up to 20 MPa.

**Table 2. Binary interaction parameters used**

| System                             | $k_{ij}$ |                      | $k_{ji}$    |                      |
|------------------------------------|----------|----------------------|-------------|----------------------|
|                                    | $c_{ij}$ | $d_{ij} \times 10^4$ | $c_{ji}$    | $d_{ji} \times 10^4$ |
| CO <sub>2</sub> (1)/methanol(2) †† | -0.1776  | 7.543                | 0.000002466 | 2.243                |
| CO <sub>2</sub> (1)/ethanol(2) †   | -0.02512 | 4.488                | 0.003956    | 2.714                |
| CO <sub>2</sub> (1)/water(2) †     | -0.4832  | 12.02                | 0.1729      | 1.098                |

† Binary interaction parameters obtained from [2]; †† Binary interaction parameters correlated with VLE data from [3] (290K-330K).

According to the added CO<sub>2</sub>, the estimated molar fractions of CO<sub>2</sub> are 0.92 and 0.89, respectively, for 1ml ethanol and 1ml methanol in a high-pressure

visual vessel (the overall volume is about 12 ml), therefore, for the both cases, the mixtures are in supercritical state as watched by the visual vessel.

### Literature Cited

- [1] R. Stryjek, J. H. Vera, *Can. J. Chem. Eng.* **1986**, *64*, 323.  
[2] J. Li, M. Rodrigues, H. Matos, E. G. de Azevedo, *Ind. Eng. Chem. Res.* **2005**, *44*, 6751.  
[3] J. H. Hong, R. Kobayashi, *Fluid Phase Equil.* **1988**, *41*, 269.

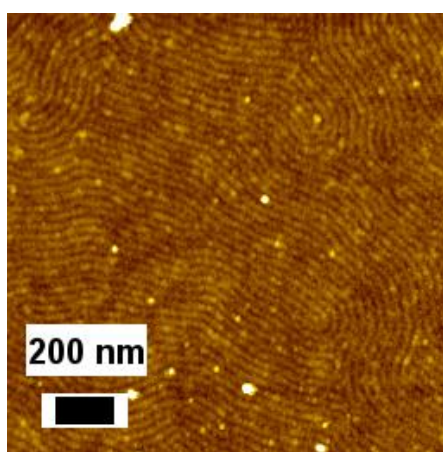

Figure S1. Topographic images of PS-*b*-P4VP thin film spun-cast using toluene and subsequent thermal annealing at 130 °C for 60 h.

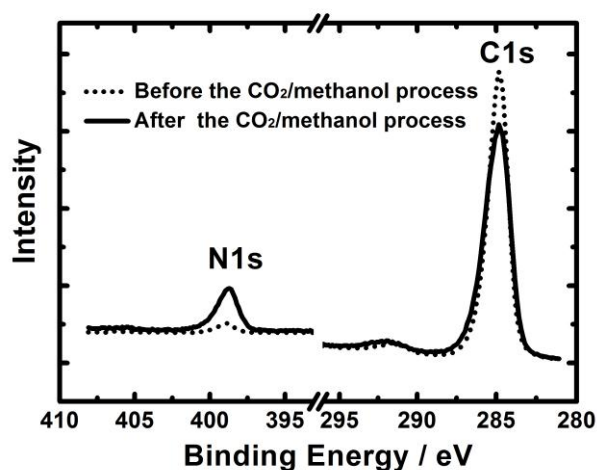

Figure S2. XPS core level scans for C1s and N1s of PS-*b*-P4VP films before (dotted line) and after (solid line) the CO<sub>2</sub>/methanol process.

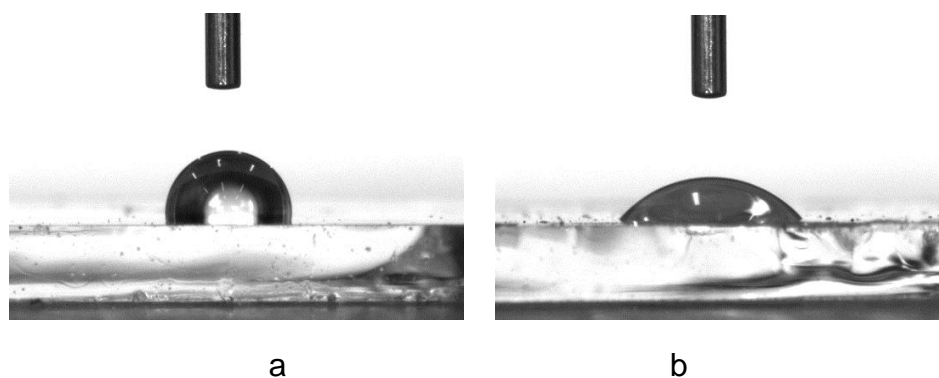

Figure S3. Photographs of water droplets placed on the PS-*b*-P4VP films: (a) the as-cast film (the contact angle = 102.7°); (b) the processed film (the contact angle = 51.2°) at 20 MPa, 45 °C for 0.5 h.

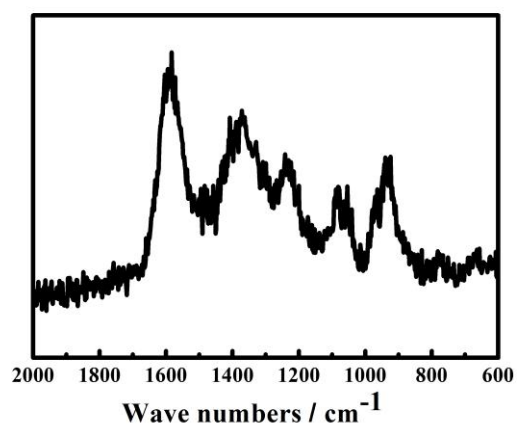

Figure S4. The 638 nm excited Raman spectra of porous PPy film.

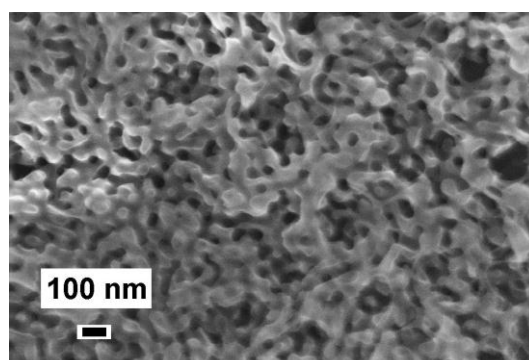

Figure S5. SEM image of a platinum replica of the nanoporous PS-*b*-P4VP film obtained by a CO<sub>2</sub>/methanol

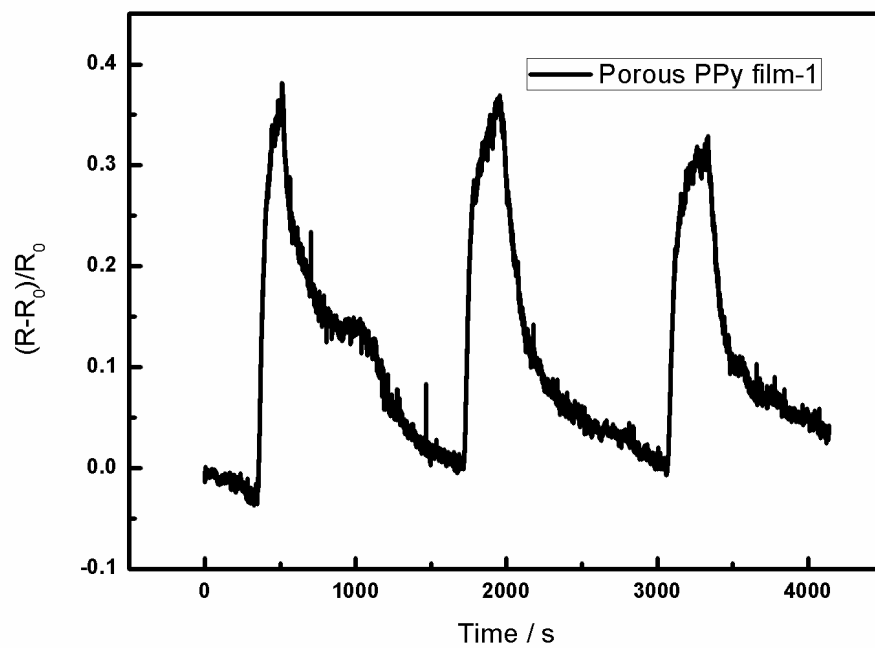

Figure S6. Reversible ammonia gas sensing performance of porous PPy film-1(Sample 1).
